# Supplementary material
Source: PubMed Central journal article supplement (PMC4313872)
Supplement: NIHMS630249-supplement-1.pdf [file NIHMS630249-supplement-1.pdf]

**GUIDE TO SUPPLEMENTARY INFORMATION  
FOR**

**Age-related cancer mutations associated with clonal hematopoietic expansion**

Mingchao Xie<sup>1,2\*</sup>, Charles Lu<sup>1\*</sup>, Jiayin Wang<sup>1,2\*</sup>, Michael D. McLellan<sup>1</sup>, Kimberly J. Johnson<sup>3</sup>, Michael C. Wendl<sup>1,4,5</sup>, Joshua F. McMichael<sup>1</sup>, Heather K. Schmidt<sup>1</sup>, Venkata Yellapantula<sup>1,2</sup>, Christopher A. Miller<sup>1</sup>, Bradley A. Ozenberger<sup>1,2</sup>, John S. Welch<sup>2,6</sup>, Daniel C. Link<sup>2,6</sup>, Matthew J. Walter<sup>2,6</sup>, Elaine R. Mardis<sup>1,2,4,6</sup>, John F. Dpersio<sup>2,6</sup>, Feng Chen<sup>2,6</sup>, Richard K. Wilson<sup>1,2,4,6</sup>, Timothy J. Ley<sup>1,2,4,6</sup>, Li Ding<sup>1,2,4,6#</sup>

<sup>1</sup>The Genome Institute, <sup>2</sup>Department of Medicine, <sup>4</sup>Department of Genetics, <sup>5</sup>Department of Mathematics, <sup>6</sup>Siteman Cancer Center, Washington University in St. Louis, MO 63108, USA

<sup>3</sup>Brown School Master of Public Health Program, Washington University in St. Louis, St. Louis, MO 63130, USA

\*These authors contributed equally to this work.

# Corresponding Author:

Li Ding, Ph.D.

The Genome Institute

Division of Oncology, Department of Medicine

Washington University School of Medicine

St. Louis, MO 63108

Email: [lding@genome.wustl.edu](mailto:lding@genome.wustl.edu)

**Journal:** Nature Medicine

|                              |                                                                             |
|------------------------------|-----------------------------------------------------------------------------|
| <b>Article Title:</b>        | Age-related cancer mutations associated with clonal hematopoietic expansion |
| <b>Corresponding Author:</b> | Dr. Li Ding                                                                 |

| <b>Supplementary Item &amp; Number<br/>(add rows as necessary)</b> | <b>Title or Caption</b>                                                                                                                                                                                                                                                                                                                                                                                                             |
|--------------------------------------------------------------------|-------------------------------------------------------------------------------------------------------------------------------------------------------------------------------------------------------------------------------------------------------------------------------------------------------------------------------------------------------------------------------------------------------------------------------------|
| Supplementary Figure 1                                             | Distribution of blood-specific mutations in <i>DNMT3A</i> , <i>TET2</i> , <i>JAK2</i> , <i>ASXL1</i> , <i>SF3B1</i> , <i>GNAS</i> , and all 31 genes across different age groups. The 91 sites include 77 detected by our processing pipeline and 14 low VAF sites (2 to 10%) identified by read count-based analysis. The total includes all blood-specific mutations in 556 cancer associated genes identified in each age group. |
| Supplementary Figure 2                                             | Distinct and common connections among normal blood samples, MPN, MDS, CLL, and AML cases. A combination of precursor, initiating mutations in the normal blood samples may rarely collaborate with subsequent, progression mutations to develop MPN, MDS, CLL, and/or AML.                                                                                                                                                          |
| Supplementary Table 1a                                             | Sample IDs for the 2,728 TCGA cases included in this study.                                                                                                                                                                                                                                                                                                                                                                         |
| Supplementary Table 1b                                             | Samples included in the study and their clinical characteristics.                                                                                                                                                                                                                                                                                                                                                                   |
| Supplementary Table 1c                                             | The distribution of germline variants across 2,728 TCGA samples. TCGA Ovarian counts were collected from the previous report.                                                                                                                                                                                                                                                                                                       |
| Supplementary Table 2                                              | Somatic mutations in 2,241 TCGA tumor samples included in the study. Somatic mutation data are unavailable for a subset of samples.                                                                                                                                                                                                                                                                                                 |
| Supplementary Table 3a                                             | Somatic mutations in 3,355 TCGA tumor samples from 12 cancer types used for identifying recurrent mutations.                                                                                                                                                                                                                                                                                                                        |
| Supplementary Table 3b                                             | Recurrent somatic mutations from 12 TCGA cancer types used for hotspot analysis.                                                                                                                                                                                                                                                                                                                                                    |
| Supplementary Table 4                                              | 556 cancer-associated genes used in this study.                                                                                                                                                                                                                                                                                                                                                                                     |
| Supplementary Table 5a                                             | 77 blood-specific events detected in 2,728 cases using our standard discovery pipeline.                                                                                                                                                                                                                                                                                                                                             |
| Supplementary Table 5b                                             | Low-level blood-specific events detected in <i>DNMT3A</i> , <i>JAK2</i> , <i>SF3B1</i> , <i>GNAS</i> , and <i>IDH2</i> in TCGA samples.                                                                                                                                                                                                                                                                                             |
| Supplementary Table 5c                                             | Deep-sequencing based validation of low-level blood-specific events detected in <i>DNMT3A</i> , <i>JAK2</i> , and <i>SF3B1</i> in TCGA samples.                                                                                                                                                                                                                                                                                     |
| Supplementary Table 6                                              | Truncation and hotspot variants in four prominent genes ( <i>DNMT3A</i> , <i>TET2</i> , <i>JAK2</i> , and <i>ASXL1</i> ) involved in HSPC clonal expansion in 6,503 ESP samples.                                                                                                                                                                                                                                                    |
| Supplementary Table 7                                              | Rare truncation variants and known hotspot variants detected in <i>DNMT3A</i> , <i>TET2</i> , <i>ASXL1</i> , <i>GNAS</i> , <i>JAK2</i> , <i>SF3B1</i> , <i>IDH1</i> , and <i>IDH2</i> in 557 WHISP samples.                                                                                                                                                                                                                         |
| Supplementary Table 8                                              | Exome capture sequencing coverage for 11 TCGA cancer types analyzed.                                                                                                                                                                                                                                                                                                                                                                |

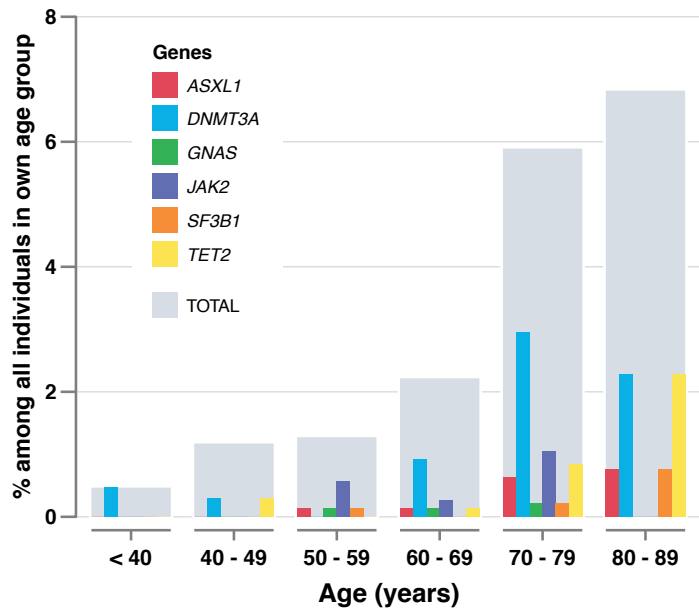

**Supplementary Figure 1** Distribution of blood-specific mutations in *DNMT3A*, *TET2*, *JAK2*, *ASXL1*, *SF3B1*, *GNAS*, and all 31 genes across different age groups. The 91 sites include 77 detected by our processing pipeline and 14 low VAF sites (2 to 10%) identified by read count-based analysis. The total includes all blood-specific mutations in 556 cancer associated genes identified in each age group.

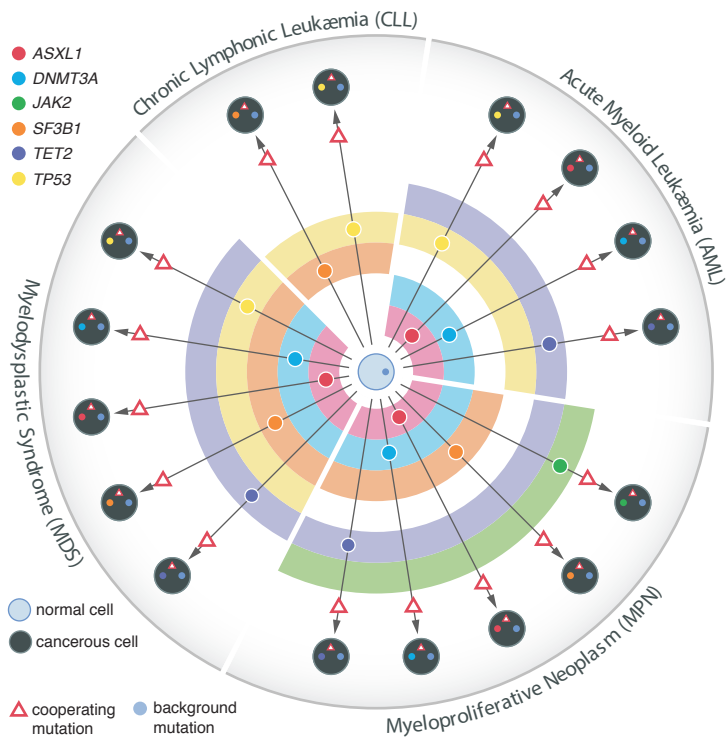

**Supplementary Figure 2** Distinct and common connections among normal blood samples, MPN, MDS, CLL, and AML cases. A combination of precursor, initiating mutations in the normal blood samples may rarely collaborate with subsequent, progression mutations to develop MPN, MDS, CLL, and/or AML.
